# Supplementary material for: First Asp-2078-Gly Mutation Conferring Resistance to Different ACCase Inhibitors in a Polypogon fugax Population from China
Source: MDPI journal article supplement (doi:10.3390/ijms24010528), 2022-12-28
Supplement: s1 [file s1]

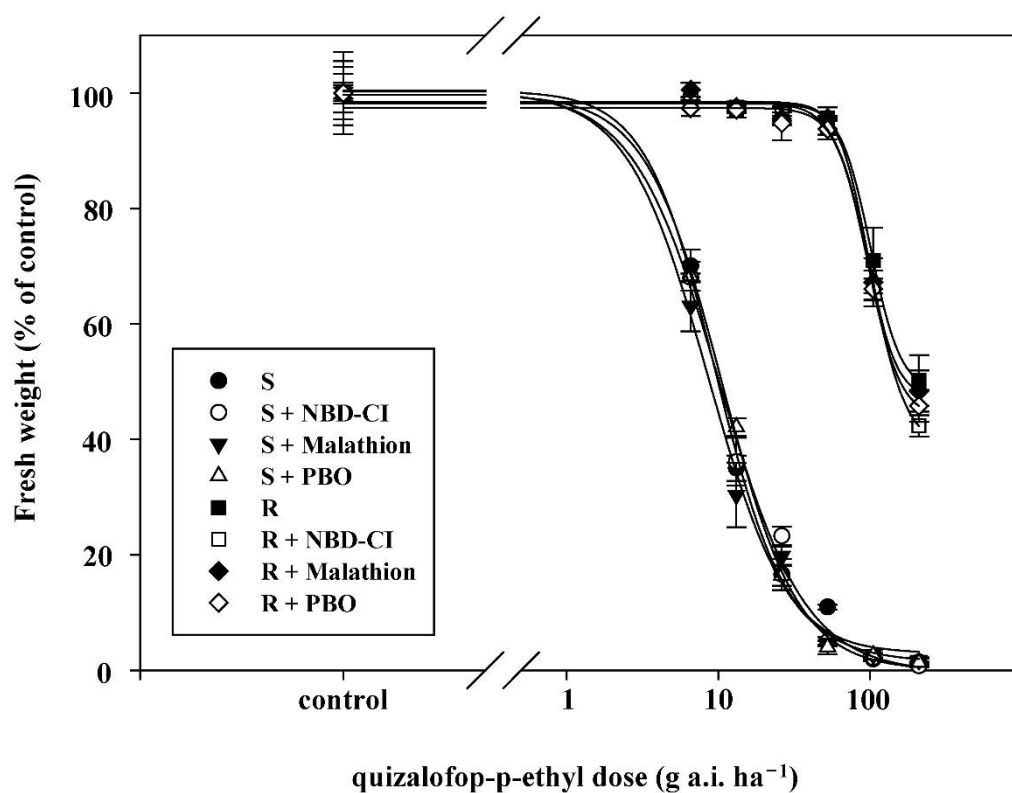

**Figure S1.** Sensitivities of the R and S *Polypogon fugax* populations to quizalofop-P-ethyl, quizalofop-P-ethyl plus NBD-Cl, quizalofop-P-ethyl plus malathion or quizalofop-P-ethyl plus PBO. R, the resistant population; S, the sensitive population; NBD-Cl, 4-chloro7-nitrobenzoxadiazole; PBO, piperonyl butoxide.

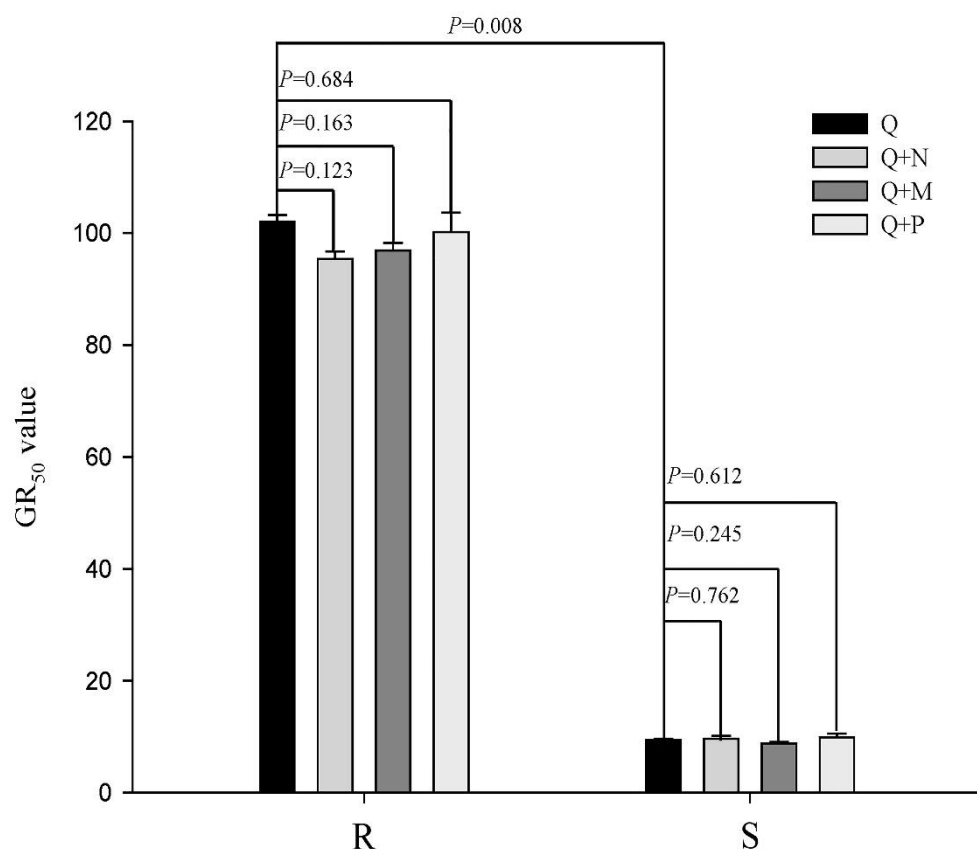

**Figure S2.** The significant difference of  $GR_{50}$  values between the two runs in different quizalofop-p-ethyl treatment groups. R, the resistant population; S, the sensitive population. Q, quizalofop-p-ethyl; N, NBD-Cl; M, malathion; P, PBO.  $GR_{50}$ , the herbicide dose causing 50% reduction of fresh weight; Mean comparison was performed using the single sample *t-test* by SPSS v23 (IBM, Armonk, USA).

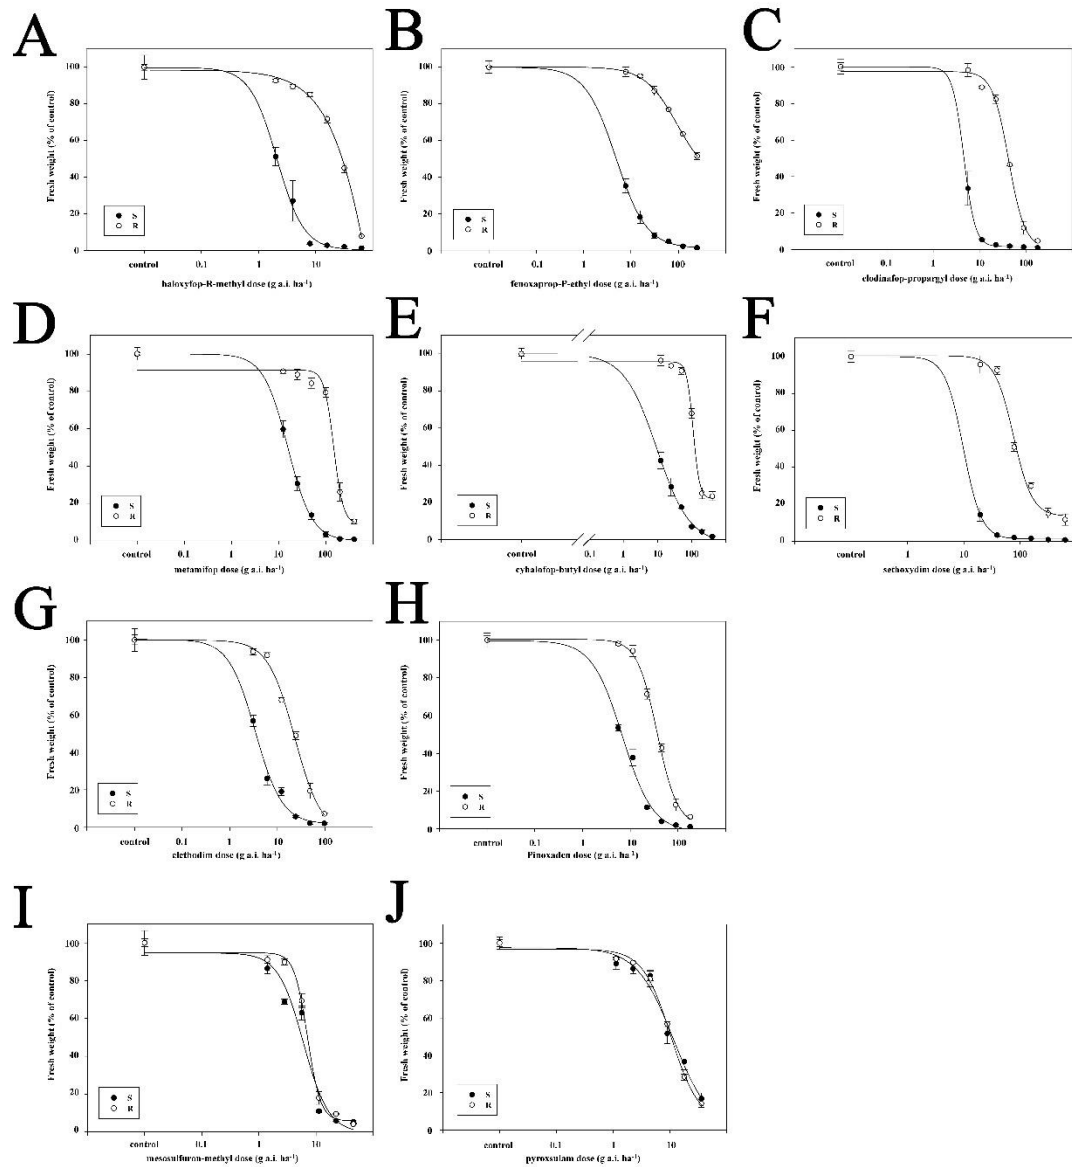

**Figure S3.** Growth response of the quizalofop-p-ethyl-resistant and -susceptible *Polypogon fugax* populations to other acetyl-CoA carboxylase inhibitors and acetolactate synthase inhibitors. R, the resistant population; S, the sensitive population; Acetyl-CoA carboxylase inhibitor: A, haloxypfop-R-methyl; B, fenoxaprop-P-ethyl; C, clodinafop-propargyl; D, metamifop; F, cyhalofop-butyl; G, sethoxydim; H, clethodim; I, pinoxaden. Acetolactate synthase inhibitor: I, mesosulfuron-methyl; J, pyroxulam.

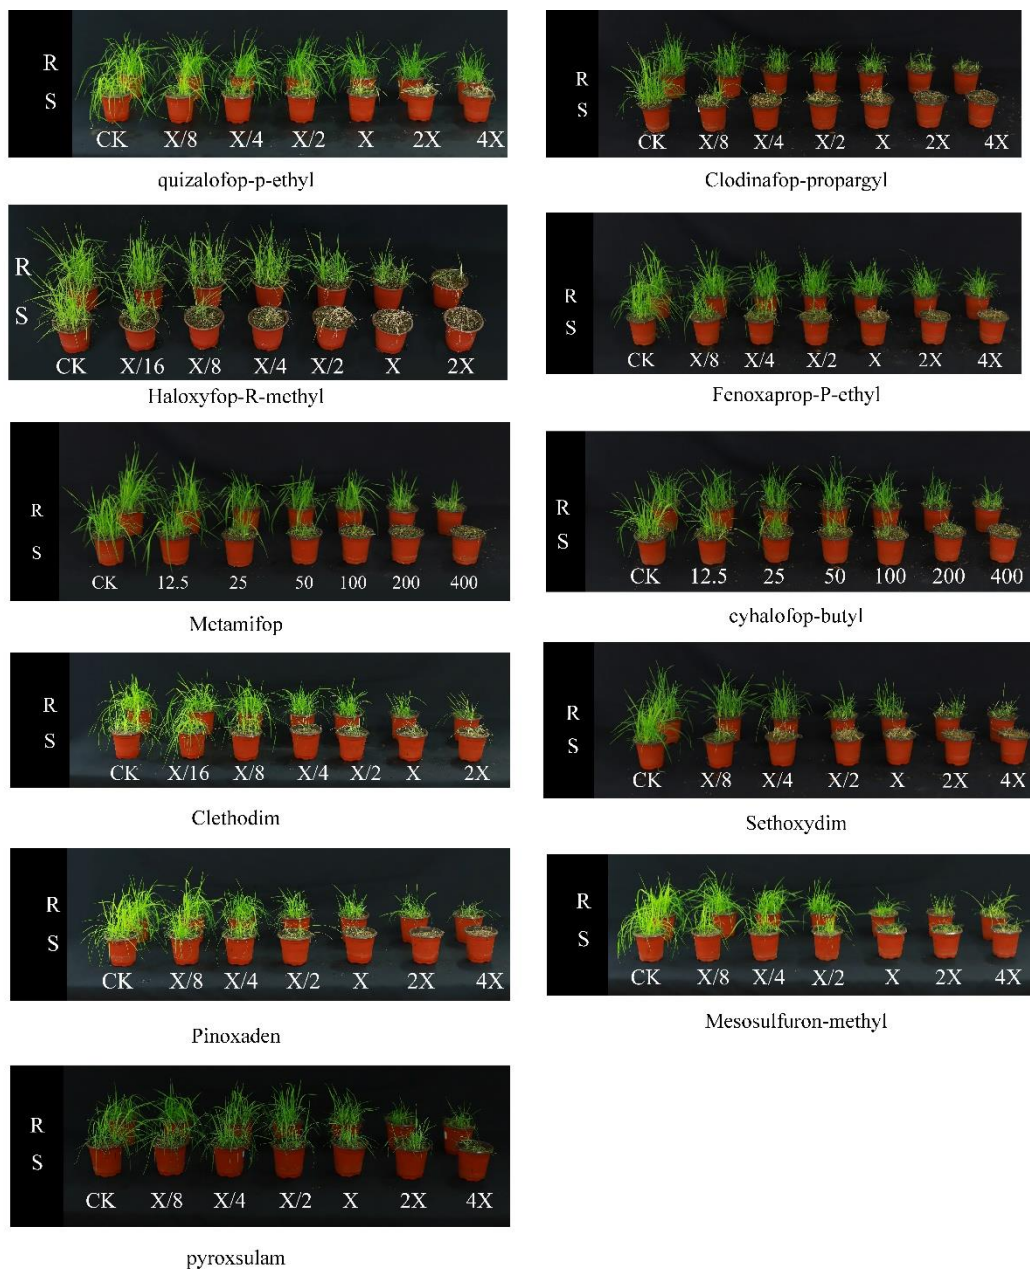

**Figure S4.** Growth effects of each inhibitor on the resistant and susceptible *Polypogon fugax* populations. R, the resistant population; S, the sensitive population; X, the recommended field rate.

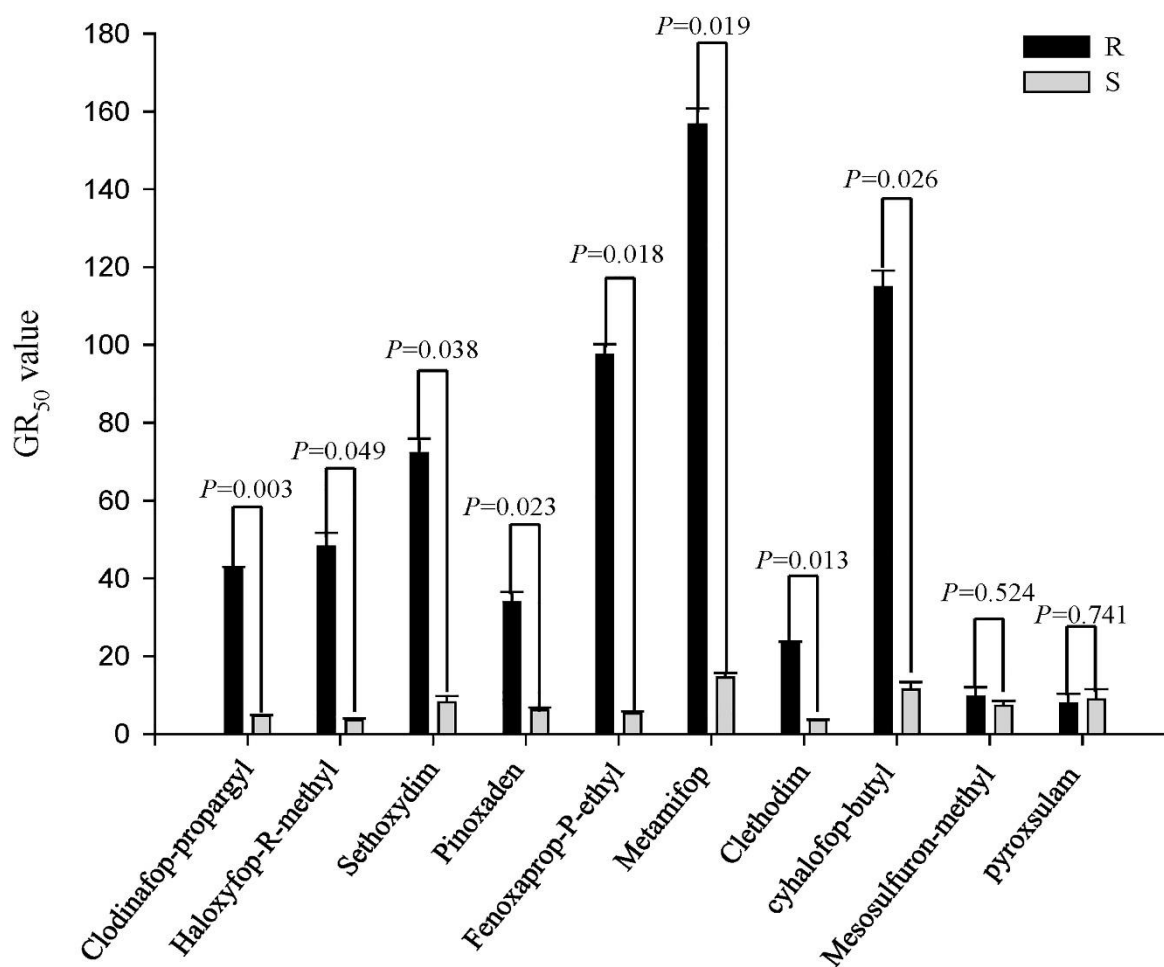

**Figure S5.** The significant difference of GR<sub>50</sub> values between the two runs in different herbicides. R, the resistant population; S, the sensitive population. GR<sub>50</sub>, the herbicide dose causing 50% reduction of fresh weight; Mean comparison was per-formed using the single sample t-test by SPSS v23 (IBM, Armonk, USA).

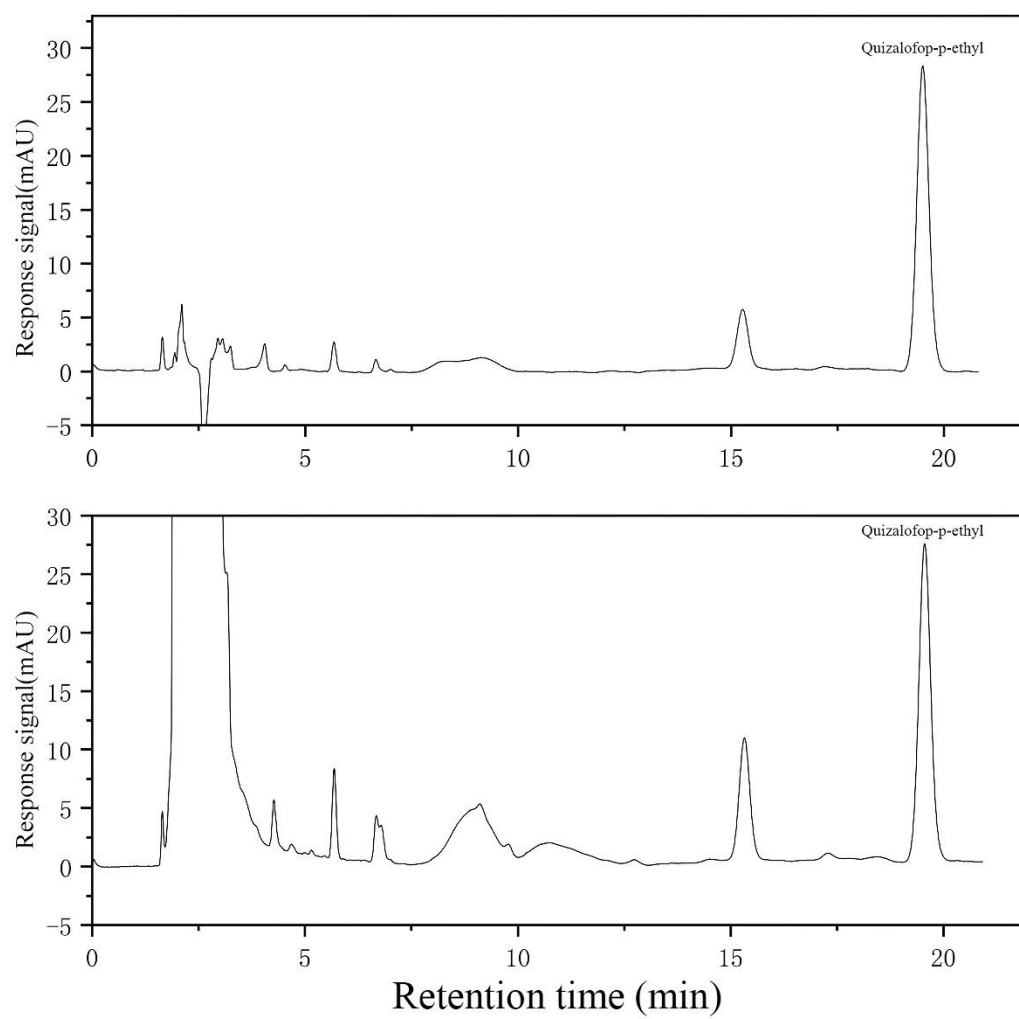

**Figure S6.** Typical chromatograms of quizalofop-P-ethyl from standard (up) and extract samples (down).
